# Supplementary material for: Effect of SSRI discontinuation on anxiety-like behaviours in mice
Source: bioRxiv or medRxiv preprint supplement (doi:10.1101/2021.05.29.446266), 2022-03-15
Supplement: Supplementary file [file media-1.pdf]

## Supplementary information

### Supplementary Figure 1

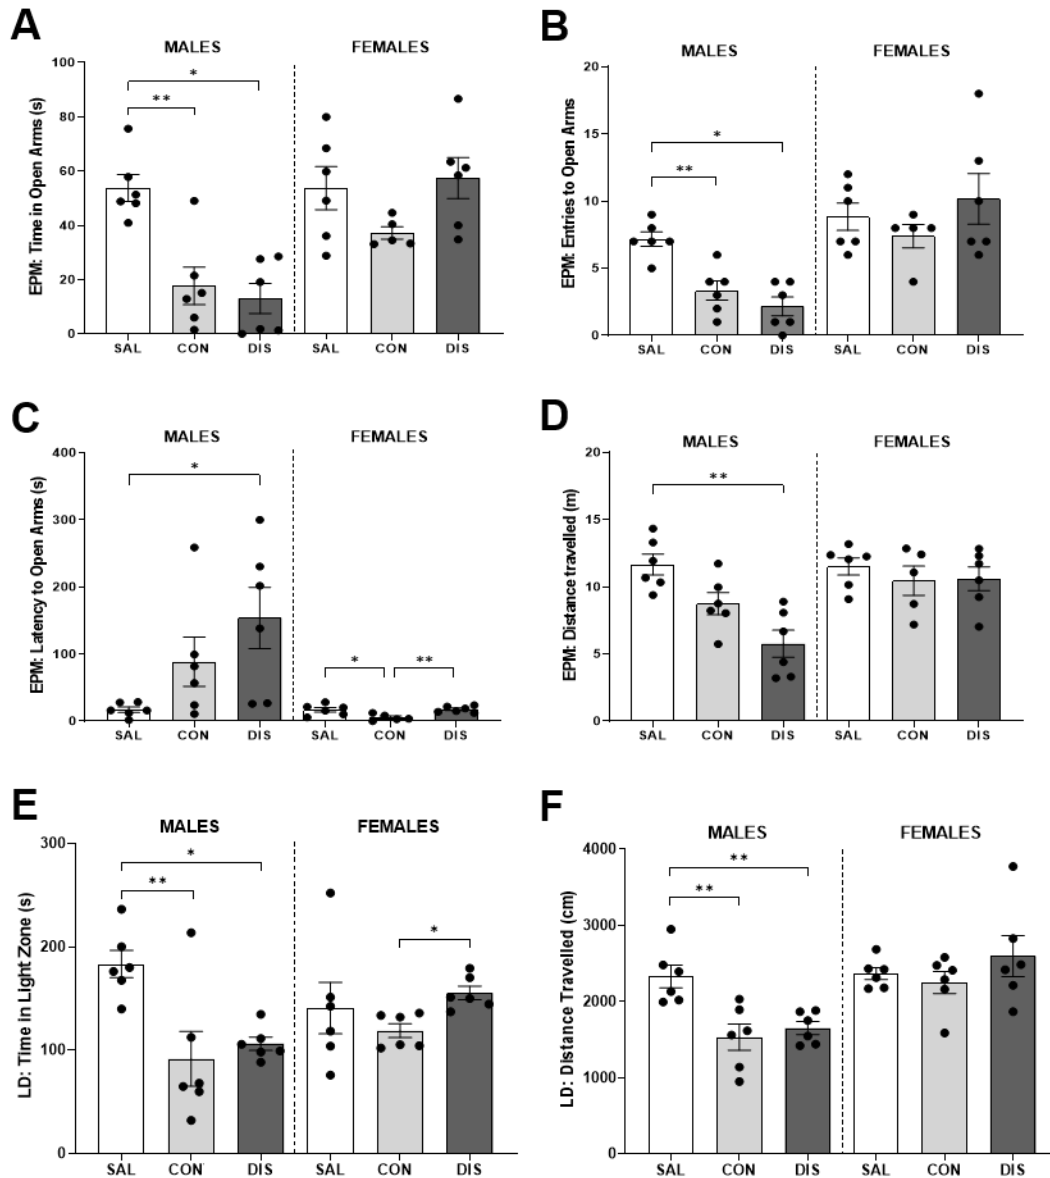

Effect of discontinuation from 12 days of once-daily paroxetine treatment in male and female mice on the elevated plus maze (EPM; 300 s) and the light/dark box (LDB; 300 s). Bars represent the mean  $\pm$  SEM values for time spent in open arms (males:  $p=0.0309$  SAL vs CON,  $p=0.0030$  SAL vs DIS) (A), entries to open arms (males:  $p=0.0285$  SAL vs CON,  $p=0.0009$  SAL vs DIS) (B), latency to enter the open arms (males:  $p=0.0157$  SAL vs DIS; females:  $p=0.0355$  SAL vs CON,  $p=0.0189$  CON vs DIS) (C) and distance travelled (males:  $p=0.0001$  SAL vs DIS) (D) on the EPM, and time spent in the light zone (males:  $p=0.0058$  SAL vs CON,  $p=0.0231$  SAL vs DIS; females:  $p=0.00110$  CON vs DIS) (F) and distance travelled (males:  $p=0.0069$  SAL vs CON,  $p=0.0049$  SAL vs

DIS) (G) on the LDB. SAL, Saline (males n=6, females n=6); CON, Continuation (males n=6, females n=5, one female mouse excluded due to technical issues during testing); DIS, Discontinuation (males n=6, females n=6). Individual values are indicated by dots. Kruskal-Wallis followed by post-hoc Fisher's LSD, \* p<0.05, \*\* p<0.01.

Supplementary Figure 2

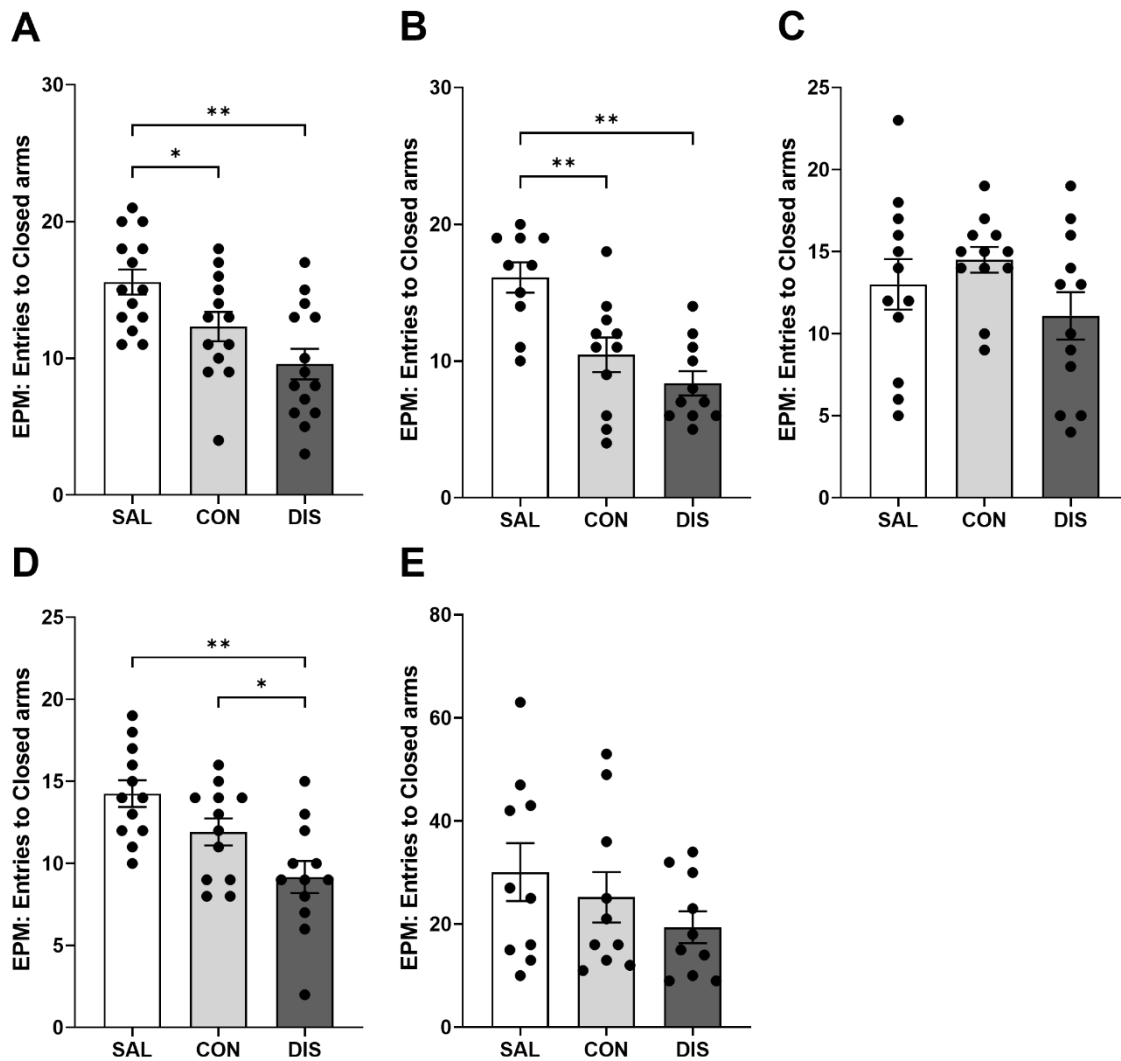

Effect of discontinuation from paroxetine or citalopram treatment in male mice on the closes arm entries on the elevated plus maze (EPM; 300 s). Bars represent the mean  $\pm$  SEM values for number of entries to the closed arms following discontinuation from 12-days once-daily paroxetine ( $p=0.0336$  SAL vs CON,  $p=0.0002$  SAL vs DIS) (A), 28-days of once-daily paroxetine ( $p=0.0012$  SAL vs CON,  $p<0.0001$  SAL vs DIS) (B), 7-days once-daily paroxetine (C), 12-days twice-daily paroxetine ( $p=0.0002$  SAL vs DIS,  $p=0.0331$  CON vs DIS) (D) and 12-days twice-daily citalopram (E). SAL, Saline (n=10-14); CON, Continuation (n=10-14); DIS, Discontinuation (n=10-14). Individual values are indicated by dots. One-way ANOVA followed by post-hoc Fisher's LSD, \*  $p<0.05$ , \*\*  $p<0.01$ .

### Supplementary Table 1

Effect of Saline (SAL), Continuation (CON) or Discontinuation (DIS) treatments with 12-days once-daily paroxetine in male and female mice. LMA, locomotor activity (60 min); AOF, aversive open field (600 s). Each value is a mean  $\pm$  S.E.M.

| Parameter              | Kruskal<br>Wallis     | MALES (n=6/group)      |                   |                   | Kruskal<br>Wallis     | FEMALES (n=6/group)    |                   |                    |
|------------------------|-----------------------|------------------------|-------------------|-------------------|-----------------------|------------------------|-------------------|--------------------|
|                        |                       | Group (mean $\pm$ SEM) |                   |                   |                       | Group (mean $\pm$ SEM) |                   |                    |
|                        |                       | SAL                    | CON               | DIS               |                       | SAL                    | CON               | DIS                |
| <i>LMA</i>             |                       |                        |                   |                   |                       |                        |                   |                    |
| Total beam breaks      | H(2)=1.906<br>p=0.408 | 2325 $\pm$<br>239      | 1974 $\pm$<br>163 | 1857 $\pm$<br>147 | H(2)=4.433<br>p=0.108 | 2677<br>$\pm$ 140      | 2314 $\pm$<br>181 | 3274 $\pm$<br>461  |
| Total rearings         | H(2)=2.854<br>p=0.251 | 175 $\pm$<br>17        | 165 $\pm$ 10      | 191 $\pm$ 5       | H(2)=1.556<br>p=0.484 | 162 $\pm$<br>19        | 179 $\pm$ 14      | 196 $\pm$ 13       |
| <i>AOF</i>             |                       |                        |                   |                   |                       |                        |                   |                    |
| Time in centre (s)     | H(2)=0.737<br>p=0.715 | 13.7 $\pm$<br>2.5      | 24.2 $\pm$ 9.3    | 11.2 $\pm$ 3.0    | H(2)=0.924<br>p=0.652 | 11.1 $\pm$<br>1.5      | 14.9 $\pm$ 4.6    | 22.3 $\pm$ 7.5     |
| Distance travelled (m) | H(2)=3.591<br>p=0.170 | 50.1 $\pm$<br>4.5      | 40.3 $\pm$ 5.1    | 45.5 $\pm$ 3.7    | H(2)=0.947<br>p=0.640 | 58.8 $\pm$<br>3.7      | 54.0 $\pm$ 6.6    | 74.5 $\pm$<br>16.2 |

## Supplementary Table 2

Effect of Saline (SAL), Continuation (CON) or Discontinuation (DIS) treatments with 28-day once-daily paroxetine in male mice. LMA, locomotor activity (60 min); AOF, aversive open field (600 s); LDB, light/dark box (600 s). 1 mouse excluded from the LMA onwards due to receiving the wrong injection the night before; 1 mouse excluded from the LMA due to issues with the photobeam box during testing. Each value is a mean  $\pm$  S.E.M., and the statistical outcomes of pairwise comparisons were: SAL vs DIS \* $p < 0.05$ ; SAL vs CON † $p < 0.05$ , †† $p < 0.01$ .

|                        | ANOVA/<br>Kruskal Wallis       | Paroxetine (n=12/group) |                               |                  |
|------------------------|--------------------------------|-------------------------|-------------------------------|------------------|
|                        |                                | SAL                     | CON<br>Group (mean $\pm$ SEM) | DIS              |
| <i>LMA</i>             |                                |                         |                               |                  |
| Total beam breaks      | $F_{(2,31)}=3.872$ $p=0.032$   | 2522 $\pm$ 154          | 2061 $\pm$ 148 †              | 2044 $\pm$ 110 * |
| Total rearings         | $F_{(2,31)}=0.336$ $p=0.717$   | 167.2 $\pm$ 14.5        | 181.5 $\pm$ 8.7               | 169.3 $\pm$ 15.5 |
| <i>AOF</i>             |                                |                         |                               |                  |
| Time in centre (s)     | $F_{(2,32)}=2.327$ $p=0.114$   | 11.9 $\pm$ 1.0          | 8.5 $\pm$ 1.6                 | 7.8 $\pm$ 1.7    |
| Distance travelled (m) | $F_{(2,32)}=10.01$ $p < 0.001$ | 64.6 $\pm$ 4.7          | 40.1 $\pm$ 3.0 ††             | 49.8 $\pm$ 4.0 * |

### Supplementary Table 3

Effect of Saline (SAL), Continuation (CON) or Discontinuation (DIS) treatments with 12-days twice-daily paroxetine in male mice. LMA, locomotor activity (60 min); AOF, aversive open field (600 s); FC, fear conditioning; CS, conditioned stimulus. 1 SAL and 1 CON mouse excluded due to technological issues on training day. Each value is a mean  $\pm$  S.E.M., and the statistical outcomes of pairwise comparisons were: SAL vs DIS \* $p < 0.01$ ; SAL vs CON † $p < 0.05$ .

|                        | ANOVA/<br>Kruskal Wallis         | Paroxetine (n=11-12/group) |                               |                    |
|------------------------|----------------------------------|----------------------------|-------------------------------|--------------------|
|                        |                                  | SAL                        | CON<br>Group (mean $\pm$ SEM) | DIS                |
| <i>LMA</i>             |                                  |                            |                               |                    |
| Total beam breaks      | $F_{(2,33)}=0.073$ , $p=0.929$   | 1913.7 $\pm$ 161.7         | 1906.8 $\pm$ 137.4            | 1839.5 $\pm$ 134.3 |
| Total rearings         | $F_{(2,33)}=1.293$ , $p=0.288$   | 190.4 $\pm$ 10.4           | 170 $\pm$ 10.4                | 173.1 $\pm$ 6.3    |
| <i>AOF</i>             |                                  |                            |                               |                    |
| Time in centre (s)     | $F_{(2,32)}=2.167$ , $p=0.1306$  | 6.6 $\pm$ 0.9              | 3.8 $\pm$ 1.0                 | 5.7 $\pm$ 1.0      |
| Distance travelled (m) | $F_{(2,33)}=5.560$ , $p=0.0083$  | 28.3 $\pm$ 1.8             | 21.6 $\pm$ 1.7 †              | 21.4 $\pm$ 1.5 *   |
| <i>FC</i>              |                                  |                            |                               |                    |
| Training day           |                                  |                            |                               |                    |
| $\Delta$ Freezing (%)  | $F_{(2,31)}=2.549$ , $p=0.0944$  | 5.6 $\pm$ 1.8              | -0.6 $\pm$ 1.8                | 2.4 $\pm$ 2.1      |
| Test day               |                                  |                            |                               |                    |
| Pre-CS freezing (%)    | $F_{(2,31)}=0.2451$ , $p=0.7842$ | 19.2 $\pm$ 6.6             | 25.6 $\pm$ 8.1                | 22.4 $\pm$ 4.0     |
| Post-CS freezing (%)   | $F_{(2,31)}=0.1248$ , $p=0.8831$ | 39.3 $\pm$ 7.5             | 38.2 $\pm$ 8.9                | 43.1 $\pm$ 5.6     |
| $\Delta$ Freezing (%)  | $F_{(2,31)}=0.3106$ , $p=0.7353$ | 19.9 $\pm$ 5.9             | 14.6 $\pm$ 4.5                | 19.03 $\pm$ 4.6    |

### Supplementary Table 4

Effect of Saline (SAL), Continuation (CON) or Discontinuation (DIS) treatments with 12-days twice-daily citalopram in male mice. LMA, locomotor activity (60 min); AOF, aversive open field (600 s); FC, fear conditioning. Each value is a mean  $\pm$  S.E.M.

|                        | ANOVA/<br>Kruskal Wallis      | Citalopram (n=10/group) |                        |                    |
|------------------------|-------------------------------|-------------------------|------------------------|--------------------|
|                        |                               | SAL                     | Group (mean $\pm$ SEM) |                    |
|                        |                               |                         | CON                    | DIS                |
| <i>LMA</i>             |                               |                         |                        |                    |
| Total beam breaks      | $F_{(2,27)}=0.7999, p=0.4598$ | 2491.0 $\pm$ 131.1      | 2190.0 $\pm$ 261.5     | 2298.0 $\pm$ 260.4 |
| Total rearings         | $F_{(2,27)}=1.6710, p=0.0276$ | 202.3 $\pm$ 6.6         | 156.1 $\pm$ 16.2       | 171.4 $\pm$ 10.0   |
| <i>AOF</i>             |                               |                         |                        |                    |
| Time in centre (s)     | $F_{(2,27)}=0.4738, p=0.6279$ | 9.1 $\pm$ 1.2           | 9.3 $\pm$ 1.0          | 8.9 $\pm$ 1.0      |
| Distance travelled (m) | $F_{(2,27)}=0.6227, p=0.5440$ | 37.4 $\pm$ 3.0          | 32.3 $\pm$ 2.3         | 32.3 $\pm$ 3.1     |
| <i>FC</i>              |                               |                         |                        |                    |
| Training day           |                               |                         |                        |                    |
| $\Delta$ Freezing (%)  | $F_{(2,27)}=0.9676, p=0.3928$ | 6.8 $\pm$ 2.4           | 12.8 $\pm$ 3.1         | 8.0 $\pm$ 4.0      |
| Test day               |                               |                         |                        |                    |
| Pre-CS freezing (%)    | $F_{(2,27)}=2.247, p=0.1073$  | 17.0 $\pm$ 5.2          | 43.5 $\pm$ 9.0         | 26.3 $\pm$ 9.9     |
| Post-CS freezing (%)   | $F_{(2,27)}=2.932, p=0.0704$  | 60.5 $\pm$ 6.0          | 75.8 $\pm$ 5.3         | 53.3 $\pm$ 26.6    |
| $\Delta$ Freezing (%)  | $F_{(2,27)}=1.215, p=0.3124$  | 43.5 $\pm$ 6.5          | 33.3 $\pm$ 7.1         | 27.0 $\pm$ 8.9     |
